1 **Explanatory factors for Ethnic inequalities in Multimorbidity; findings from**  
2 **pooled Health Survey for England 2011-2018**

3 **Authors:** Linda Ng Fat<sup>1</sup>, Jennifer S Mindell<sup>1</sup>, Logan Manikam<sup>1</sup>, Shaun Scholes<sup>1</sup>

4 \* **Corresponding author:** Linda Ng Fat, [l.ngfat@ucl.ac.uk](mailto:l.ngfat@ucl.ac.uk), Health and Social Surveys  
5 Group, Department of Epidemiology and Public Health, UCL, 1-19 Torrington Place,  
6 London, WC1E 7HB

7

8

9 <sup>1</sup> Health and Social Surveys Group, Research Department of Epidemiology and  
10 Public Health, University College London (UCL), 1-19 Torrington Place, London,  
11 WC1E 7HB

12

13

14 **Key words:** Ethnic inequalities, Multimorbidity, Cardiovascular multimorbidity,  
15 England

16

17

18 **Abstract**

19 **Background**

20 Social-economic factors and health behaviours may be driving variation in ethnic health  
21 inequalities in multimorbidity including among distinct ethnic groups.

22 **Methods**

23 Using the cross-sectional nationally-representative Health Surveys for England 2011-2018  
24 (N=54,438, aged 16+), we carried out multivariable logistic regression on the odds of having  
25 general multimorbidity ( $\geq 2$  longstanding conditions) by ethnicity (British White (reference  
26 group), White Irish, Other White, Indian, Pakistani, Bangladeshi, Chinese, African,  
27 Caribbean, White Mixed, Other Mixed, Other), adjusting for age, sex, education, area-  
28 deprivation, smoking status, and survey year. This was repeated for cardiovascular  
29 multimorbidity (N=37,148, aged 40+: having  $\geq 2$  of the following: doctor-diagnosed diabetes  
30 or hypertension, heart attack or stroke) and multiple cardiometabolic risk biomarkers (HbA1c  
31  $\geq 6.5\%$ , raised blood pressure, total cholesterol  $\geq 5\text{mmol/L}$ ).

32 **Results**

33 20% of adults had general multimorbidity. In fully-adjusted models, compared with the White  
34 British majority, Other White (Odds Ratio (OR)=0.63 (95% confidence interval=(0.53-0.74)),  
35 Chinese (OR=0.58 (0.36-0.93)), and African adults (OR=0.54 (0.42-0.69)), had lower odds of  
36 general multimorbidity. Among adults aged 40+, Pakistani (OR=1.27 (0.97-1.66)  $p=0.080$ )  
37 and Bangladeshi (OR=1.75 (1.16-2.65)) had increased odds, and African adults had  
38 decreased odds (OR=0.63 (0.47-0.83)) of general multimorbidity. Risk of cardiovascular  
39 multimorbidity was higher among Indian (OR=3.31 (2.56-4.28)), Pakistani (OR=3.48 (2.52-  
40 4.80)), Bangladeshi (OR=3.67 (1.98-6.78)), African (OR=1.61 (1.05-2.47)), Caribbean  
41 (OR=2.18 (1.59-2.99)) and White Mixed (OR=1.98 (1.14-3.44)) adults. Indian adults were  
42 also at risk of having multiple cardiometabolic risk biomarkers.

43 **Conclusion**

44 Ethnic inequalities in multimorbidity are independent of socioeconomic factors. Ethnic  
45 minority groups are particularly at risk of cardiovascular multimorbidity, which may be  
46 exacerbated by poorer management of cardiometabolic risk factors.

47

48

49

50 **What is already known on this topic**

- 51 • Studies have found ethnic inequalities in multimorbidity among broad ethnic groups;  
52 however, it is not known whether lower socioeconomic status or health behaviours  
53 are driving this inequality in England, nor whether there are differences between  
54 distinct ethnic groups.

55

56 **What this study adds**

- 57 • Ethnic inequalities in multimorbidity in a nationally-representative sample in England  
58 vary between older and younger adults, distinct ethnic groups, and are independent  
59 of socioeconomic status, smoking and obesity.
- 60 • African, Caribbean, Bangladeshi, Indian, Pakistani and White mixed adults aged 40  
61 and over had higher risk of self-reported cardiovascular multimorbidity compared with  
62 British White adults. Indian adults were also at risk of multiple uncontrolled  
63 cardiometabolic risk biomarkers.
- 64 • African, Chinese, Other White and Indian adults (<40 years) had lower risk of general  
65 multimorbidity compared with the British White majority, suggesting a healthy migrant  
66 effect or differences in interpretation of chronic conditions.

67

68 **How this study might affect research, practice or policy**

- 69 • Further research is needed to explore whether underdiagnosis and/or poorer  
70 management of cardiometabolic risk factors among ethnic groups may be driving  
71 factors behind inequalities in self-reported cardiovascular multimorbidity.

72

73

74 **Explanatory factors for variations in multimorbidity among ethnic groups; findings**  
75 **from pooled nationally representative Health Survey for England 2011-2018**

76

77 **Background**

78

79 Multimorbidity is increasing, given an ageing population, affecting individuals' quality of life  
80 and increasing mortality,(1,2). Understanding the factors related to different levels of  
81 multimorbidity in ethnic groups could be used to prevent harm and reduce ethnic  
82 inequalities. Non-white ethnic groups were disproportionately affected with Covid-19, with  
83 multimorbidity potentially being one contributing factor. It was found that compared with the  
84 white population, non-white ethnicities with multimorbidity had almost triple the risk of having  
85 Covid-19(3).

86

87 Ethnic health inequalities in multimorbidity, including cardiovascular multimorbidity, exist(4–  
88 9). A study in East London found the Black and South Asian population had higher rates of  
89 cardiovascular multimorbidity than the white majority(4). Studies of ethnic health inequalities  
90 in multimorbidity in England often use GP records, which may not reflect differences in a  
91 national population sample,(4,5). Furthermore, studies in England have not comprehensively  
92 explored what may be accounting for some of the health differences, such as socioeconomic  
93 differences. Deprivation and lower socioeconomic status could increase the risk of  
94 multimorbidity,(6–8,10–12). Behavioural risk-factors could also confound the relationship.  
95 Smoking and obesity were found to be risk-factors for multimorbidity,(7,10,13), and may  
96 have a stronger effect than deprivation and ethnicity,(7,13). Smoking and obesity were found  
97 to vary in The Health Survey for England 2011-2019,(14).

98

99 Furthermore, broad ethnic groups such as 'South Asian' and 'Black' may mask heterogeneity  
100 within groups, for example among Indian versus Pakistani/Bangladeshi, and Black African  
101 versus Black Caribbean groups,(15). The aims of this study were to examine how risk of  
102 multimorbidity including cardiovascular multimorbidity varied among distinct ethnic groups,  
103 and whether this relationship was explained by difference in socioeconomic status or  
104 behavioural risk factors for cardiovascular diseases, namely smoking and obesity.

105

106 **Methods**

107

108 **Data Sources**

109

110 The Health Survey for England (HSE) is a cross-sectional, nationally-representative survey  
111 of the population occurring annually. Data is collected via new multistage stratified  
112 probability sampling each year, as described elsewhere(16). This study uses data spanning  
113 from 2011 to 2018, to maximise the number of participants from different ethnic groups. Self-  
114 reported data were collected from an initial face-to-face interview conducted by trained  
115 interviewers using computer-assisted personal interviewing (CAPI). The interviewers also  
116 measured height and weight. At the second stage, further biophysical measurements were  
117 collected at a nurse visit using standard protocols,(17). All data collection took place within  
118 participants' homes. Response rates have gradually declined over the period, e.g., from 59%  
119 in 2011 to 54% in 2018 for the face-to-face interview.

120

### 121 **General and cardiovascular multimorbidity**

122

123 This study examines ethnic group differences in two types of multimorbidity: general  
124 multimorbidity and cardiovascular multimorbidity, using information provided by participants  
125 at the interview stage. General multimorbidity was derived through self-reported responses  
126 to a question on longstanding conditions: whether the participant had any longstanding  
127 physical or mental health conditions or illnesses expected to last over a period of time (2011)  
128 or 12 months or more (2012-2018). Participants were then asked to list up to six conditions  
129 that affected them. Responses were recoded to indicate the number of longstanding  
130 conditions (none/one/two or more). Participants having two or more longstanding conditions  
131 were classified as having general multimorbidity.

132

133 Self-reported doctor-diagnosed cardiovascular multimorbidity was defined as having two or  
134 more of the following conditions: reporting having doctor-diagnosed diabetes or high blood  
135 pressure (in response to specific questions on whether participants were ever told by a  
136 doctor they had diabetes/high blood pressure) or reporting stroke or heart disease when  
137 responding to the aforementioned follow-up question to the longstanding illness question.  
138 We included doctor-diagnosed hypertension following the example of Mathur et al.(4),  
139 although other definitions do not include hypertension,(18).

140

141

### 142 **Multiple cardiometabolic risk biomarkers**

143

144 Using objective health examination measures, we also examined differences by ethnicity in  
145 multiple cardiometabolic risk biomarkers. Cardiometabolic biomarkers were treated  
146 separately from doctor-diagnosed conditions (cardiovascular multimorbidity) to identify  
147 uncontrolled risk factors. Having multiple cardiometabolic risk biomarkers was defined as  
148 two or more of the following: raised glycated haemoglobin (HbA<sub>1c</sub> levels  $\geq 6.5\%$ ); raised blood  
149 pressure (systolic blood pressure  $\geq 140$ mmHg and/or diastolic blood pressure  $\geq 90$ mmHg);  
150 and/or raised total cholesterol level ( $\geq 5$ mmol/L), suggesting uncontrolled risk-factors or  
151 disease such as diabetes or hypertension. Further details on data collection during the nurse  
152 visit have been published elsewhere,(15).

153

#### 154 **Ethnicity and other covariates**

155

156 Ethnicity was self-reported at the main interview and grouped in the following way: White  
157 British, White Irish, Other White, Indian, Pakistani, Bangladeshi, Chinese, African,  
158 Caribbean, White Mixed, Other Mixed, Other.

159

160 Other covariates included the Index of Multiple Deprivation, a standard measure of area  
161 deprivation covering different social and economic dimensions, assigned based on  
162 participants' residence,(17), grouped into quintiles. Highest educational qualification was  
163 self-reported and grouped into degree or higher; lower than degree; no qualifications. Self-  
164 reported smoking status was grouped into never; former; current smoker. BMI categories  
165 were based on height and weight measurements of the participants performed by the trained  
166 interviewer at the main interview. Detailed information on collection can be found  
167 elsewhere,(17).

168

169

#### 170 **Statistical analyses**

171

172 Complete case analyses were used and the sample was limited to (i) adults aged 16+ for  
173 general multimorbidity (N=54,438), (ii) adults aged 40+ for self-reported cardiovascular  
174 multimorbidity (N= 37,148), and (iii) adults aged 16+ with biological measurements for  
175 multiple cardiometabolic biological risk factors (N=24,203). The complete case approach  
176 resulted in a reduction in sample size of around 17.5%; this was predominately driven by  
177 missing data for BMI, which required physical measurements of height and weight (17.0%).  
178 Few participants (<0.5%) had missing responses on key variables: general multimorbidity  
179 (n=46), cardiovascular multimorbidity (n=7), and ethnicity (n=220). Missing data on

180 biomarkers was high due to not all the sample providing blood samples (59.8%). We  
181 accounted for non-response weighting, specific to non-response at the interview or blood  
182 samples for biological risk factors were applied to account for this, and the complex survey  
183 design (geographical clustering of participants) in all analyses.

184

185 Characteristics of ethnic groups were explored and chi-squared used to test for bivariate  
186 associations. Logistic regression was carried out on the risk of having multimorbidity for each  
187 of the three definitions of multimorbidity. Since longstanding conditions are broader, and  
188 multimorbidity is not restricted to older participants,(8,19), analyses of general multimorbidity  
189 focused on all adults. However, we also stratify results by aged under 40 and 40 and over. A  
190 cut-off of age 40 has been used in other large scale studies,(20), and sample sizes among  
191 some of the ethnic groups were too small if limiting to an older sample (e.g. <100, if based  
192 on adults aged 65 and over).

193

194 To explore whether the relationship between ethnicity and multimorbidity may be  
195 confounded by socioeconomic status or behavioural risk factors, variables were added in the  
196 following way, with changes in odds ratios examined to explore the effect of adjusting for  
197 each additional potential confounder.

198

199 Model 1: Sex + Age in years

200 Model 2: Model 1 + Area Deprivation

201 Model 3: Model 1 + Educational qualifications

202 Model 4: Model 1 + Smoking status

203 Model 5: Model 1 + BMI category

204 Model 6: All covariates + survey year

205

206 As a sensitivity analyses, we replicated the final models on a sample including participants  
207 without BMI measurements (without adjusting for BMI), resulting in fewer missing cases  
208 (1%). Analyses were conducted in Stata 17,(21).

209

## 210 **Results**

211

212 Chinese, Indian and Other White adults had the highest proportion of adults with the highest  
213 educational qualifications (53%-44%), whereas Bangladeshi, White Irish, Pakistani, and  
214 Caribbean had the highest proportions with no qualifications (29%-25%) (Table 1). Over two-

215 fifths of adults in the Bangladeshi, Pakistani, African and Caribbean groups lived in the most  
216 deprived areas; this proportion was lowest for White British adults (15%).  
217



**Table 1 Characteristics of ethnic groups (column %), Health Survey for England 2011-2018**

|                                                                                                                      | White British | White Irish | Other White | Indian | Pakistani | Bangladeshi | Chinese | African | Caribbean | White Mixed | Other Mixed | Other | Total  | p-value |
|----------------------------------------------------------------------------------------------------------------------|---------------|-------------|-------------|--------|-----------|-------------|---------|---------|-----------|-------------|-------------|-------|--------|---------|
| <b>Sample size (N)</b>                                                                                               | 44,922        | 440         | 2,876       | 1,382  | 859       | 368         | 278     | 804     | 496       | 477         | 268         | 1,268 | 54,438 |         |
| <b>Mean age (years)</b>                                                                                              | 48.8          | 53.4        | 37.6        | 40.6   | 36.8      | 36.5        | 36.2    | 37.3    | 48.6      | 34.1        | 38.8        | 39.8  | 46.8   |         |
| <i>standard deviation</i>                                                                                            | 19            | 17.2        | 12.5        | 14.1   | 13        | 12.4        | 13.9    | 13.1    | 17.4      | 13.4        | 14          | 14.6  | 18.5   |         |
| <b>Female</b>                                                                                                        | 50            | 47          | 52          | 48     | 50        | 49          | 53      | 52      | 56        | 49          | 51          | 51    | 50     | 0.103   |
| <b>Highest Educational qualification</b>                                                                             |               |             |             |        |           |             |         |         |           |             |             |       |        |         |
| Degree or higher                                                                                                     | 25            | 39          | 44          | 45     | 29        | 26          | 53      | 37      | 23        | 31          | 40          | 41    | 28     |         |
| Lower than degree                                                                                                    | 57            | 33          | 32          | 38     | 45        | 45          | 32      | 48      | 52        | 54          | 51          | 43    | 53     |         |
| No qualifications                                                                                                    | 18            | 28          | 25          | 17     | 26        | 29          | 14      | 15      | 25        | 15          | 10          | 17    | 19     | <0.001  |
| <b>Index of Multiple Deprivation</b>                                                                                 |               |             |             |        |           |             |         |         |           |             |             |       |        |         |
| Least deprived                                                                                                       | 23            | 18          | 13          | 15     | 5         | 3           | 19      | 5       | 8         | 12          | 11          | 13    | 20     |         |
| 2 <sup>nd</sup>                                                                                                      | 23            | 15          | 16          | 17     | 7         | 7           | 15      | 9       | 7         | 16          | 18          | 16    | 21     |         |
| 3 <sup>rd</sup>                                                                                                      | 22            | 20          | 20          | 20     | 11        | 8           | 24      | 12      | 14        | 17          | 24          | 17    | 21     |         |
| 4 <sup>th</sup>                                                                                                      | 18            | 26          | 27          | 25     | 29        | 26          | 27      | 31      | 28        | 25          | 27          | 25    | 20     |         |
| Most deprived                                                                                                        | 15            | 21          | 24          | 23     | 49        | 56          | 15      | 43      | 43        | 30          | 20          | 29    | 19     | <0.001  |
| <b>Smoking status</b>                                                                                                |               |             |             |        |           |             |         |         |           |             |             |       |        |         |
| Current smoker                                                                                                       | 19            | 20          | 27          | 8      | 15        | 18          | 10      | 7       | 21        | 29          | 17          | 12    | 19     |         |
| Ex-smoker                                                                                                            | 27            | 34          | 22          | 8      | 8         | 8           | 7       | 8       | 18        | 17          | 17          | 12    | 25     |         |
| Never smoker                                                                                                         | 54            | 47          | 52          | 84     | 77        | 74          | 83      | 85      | 61        | 54          | 67          | 76    | 57     | <0.001  |
| <b>Body Mass Index (BMI) category</b>                                                                                |               |             |             |        |           |             |         |         |           |             |             |       |        |         |
| Not overweight                                                                                                       | 36            | 38          | 48          | 44     | 36        | 44          | 74      | 36      | 29        | 46          | 44          | 43    | 38     |         |
| Overweight                                                                                                           | 37            | 35          | 33          | 38     | 37        | 42          | 22      | 33      | 32        | 31          | 35          | 35    | 36     |         |
| Obese                                                                                                                | 27            | 27          | 20          | 18     | 27        | 15          | 3       | 31      | 39        | 23          | 21          | 22    | 26     | <0.001  |
| <b>Number of longstanding conditions</b>                                                                             |               |             |             |        |           |             |         |         |           |             |             |       |        |         |
| None                                                                                                                 | 58            | 57          | 76          | 70     | 71        | 67          | 86      | 77      | 55        | 68          | 72          | 71    | 61     |         |
| One                                                                                                                  | 21            | 17          | 14          | 17     | 15        | 16          | 7       | 14      | 22        | 17          | 15          | 16    | 20     |         |
| Two or more                                                                                                          | 22            | 25          | 10          | 13     | 15        | 17          | 7       | 9       | 24        | 15          | 13          | 13    | 20     | <0.001  |
| <b>Number of longstanding conditions (aged 40 and over, N=37,135)</b>                                                |               |             |             |        |           |             |         |         |           |             |             |       |        |         |
| None                                                                                                                 | 49            | 50          | 63          | 55     | 53        | 49          | 79      | 67      | 46        | 51          | 64          | 56    | 51     |         |
| One                                                                                                                  | 23            | 20          | 17          | 22     | 19        | 18          | 10      | 17      | 24        | 24          | 16          | 23    | 22     |         |
| Two or more                                                                                                          | 28            | 31          | 20          | 23     | 29        | 33          | 12      | 16      | 30        | 25          | 20          | 21    | 27     | <0.001  |
| <b>Number of cardiovascular conditions (aged 40 and over, N= 37,148)<sup>1</sup></b>                                 |               |             |             |        |           |             |         |         |           |             |             |       |        |         |
| None                                                                                                                 | 62            | 59          | 75          | 62     | 62        | 64          | 81      | 64      | 51        | 69          | 67          | 65    | 63     |         |
| One                                                                                                                  | 31            | 32          | 21          | 26     | 23        | 22          | 15      | 28      | 33        | 22          | 29          | 26    | 30     |         |
| Two or more                                                                                                          | 7             | 9           | 4           | 12     | 15        | 15          | 4       | 7       | 16        | 9           | 4           | 9     | 7      | <0.001  |
| <b>Cardiometabolic risk biomarkers (aged 16 and over with blood samples (aged 16 and over, N=24,203)<sup>2</sup></b> |               |             |             |        |           |             |         |         |           |             |             |       |        |         |
| None                                                                                                                 | 38            | 31          | 53          | 44     | 44        | 45          | 58      | 53      | 36        | 56          | 54          | 47    | 40     |         |
| One                                                                                                                  | 47            | 52          | 40          | 42     | 48        | 47          | 35      | 38      | 45        | 39          | 39          | 43    | 46     |         |
| Two or more                                                                                                          | 14            | 17          | 7           | 15     | 8         | 9           | 7       | 10      | 19        | 6           | 7           | 10    | 14     | <0.001  |

1 Doctor-diagnosed hypertension, diabetes or self-reported stroke or heart attack; 2 Raised blood pressure, raised glycated haemoglobin or raised total cholesterol;

**Table 2 Characteristics of those with single and multiple limiting longstanding illness conditions (column %), HSE 2011-2018**

|                                                                          | None   | One    | Two or more | Total  | p-value |
|--------------------------------------------------------------------------|--------|--------|-------------|--------|---------|
| Sample size (N)                                                          | 31,233 | 11,087 | 12,118      | 54,438 |         |
| <b>Mean age (years)</b>                                                  | 41.9   | 50     | 58.3        | 46.8   |         |
| <i>Standard deviation</i>                                                | 16.5   | 18.5   | 18.2        | 18.5   |         |
| <b>Female</b>                                                            | 49     | 52     | 54          | 50     | <0.001  |
| <b>Highest educational qualification</b>                                 |        |        |             |        |         |
| Degree or higher                                                         | 31     | 27     | 19          | 28     |         |
| Lower than degree                                                        | 55     | 54     | 50          | 53     |         |
| No qualifications                                                        | 14     | 20     | 32          | 19     | <0.001  |
| <b>Index of multiple deprivation</b>                                     |        |        |             |        |         |
| Least deprived quintile                                                  | 21     | 21     | 17          | 20     |         |
| 2 <sup>nd</sup> quintile                                                 | 21     | 21     | 20          | 21     |         |
| 3 <sup>rd</sup> quintile                                                 | 21     | 22     | 21          | 21     |         |
| 4 <sup>th</sup> quintile                                                 | 19     | 19     | 21          | 20     |         |
| Most deprived quintile                                                   | 18     | 17     | 22          | 19     | <0.001  |
| <b>Smoking status</b>                                                    |        |        |             |        |         |
| Current                                                                  | 18     | 19     | 19          | 19     |         |
| Ex-regular                                                               | 21     | 28     | 34          | 25     |         |
| Never regular                                                            | 61     | 53     | 47          | 57     | <0.001  |
| <b>Body Mass Index (BMI) category</b>                                    |        |        |             |        |         |
| Not overweight                                                           | 43     | 34     | 25          | 38     |         |
| Overweight                                                               | 37     | 37     | 35          | 36     |         |
| Obese                                                                    | 21     | 29     | 40          | 26     | <0.001  |
| <b>Number of cardiovascular conditions (aged 40+, row %)<sup>1</sup></b> |        |        |             |        |         |
| None                                                                     | 63     | 21     | 17          | 100    |         |
| One condition                                                            | 36     | 26     | 39          | 100    |         |
| Two or more conditions                                                   | 9      | 18     | 73          | 100    | <0.001  |
| <b>Year (row %)</b>                                                      |        |        |             |        |         |
| 2011                                                                     | 61     | 21     | 18          | 100    |         |
| 2012                                                                     | 63     | 19     | 18          | 100    |         |
| 2013                                                                     | 62     | 19     | 20          | 100    |         |
| 2014                                                                     | 61     | 19     | 20          | 100    |         |
| 2015                                                                     | 62     | 20     | 19          | 100    |         |
| 2016                                                                     | 60     | 20     | 21          | 100    |         |
| 2017                                                                     | 58     | 20     | 22          | 100    |         |
| 2018                                                                     | 59     | 19     | 22          | 100    |         |
| 2011-2018                                                                | 61     | 20     | 20          | 100    | <0.001  |

<sup>1</sup> Doctor-diagnosed hypertension, diabetes or self-reported stroke or heart attack

220 Obesity was highest among Caribbean and African adults (39%-31%); and was lowest  
221 among Chinese, Bangladeshi and Indian adults (3%-18%). The proportion of never smoking  
222 was highest among African, Indian, Chinese, Pakistani and Bangladeshi adults (85%-74%)  
223 and was lowest among White Irish, White and White mixed adults (47%-54%).

224

225 20% of all adults had general multimorbidity (27% of adults aged 40+); this was higher  
226 among White Irish and Caribbean adults (24% and 25%, respectively), and lowest among  
227 Chinese and African adults (7% and 9%) (Table 2). 7% of adults aged 40+ had  
228 cardiovascular multimorbidity. This was highest among Caribbean, Pakistani and  
229 Bangladeshi adults (15%) and lowest among Chinese and Other White adults (4%).

230

231 Among those aged 40+ with cardiovascular multimorbidity, the combination of diabetes and  
232 hypertension was the most common dyad (70%) followed by hypertension and heart attack  
233 (12%) (Figure S1). 14% of adults aged 16+ had multiple cardiometabolic risk biomarkers;  
234 this varied by ethnicity, being highest among White Irish, Caribbean and Indian adults (15%-  
235 19%). This largely comprised the combination of raised blood pressure and raised  
236 cholesterol (76%), followed by raised cholesterol and raised glycated haemoglobin (9%)

237

238 Those with general multimorbidity were more likely to have no qualifications than those with  
239 no longstanding conditions, lived in the most deprived areas, were obese or were a current  
240 or former smoker ( $p < 0.001$ ) (Table 2). Among those classified as having cardiovascular  
241 multimorbidity (aged 40+), 73% were classified as having general multimorbidity ( $p < 0.001$ ).  
242 The prevalence of general multimorbidity increased steadily over the period, from 18% in  
243 2011 to 22% in 2018 ( $p < 0.001$ ).

244

245

#### *Figure 1 General multimorbidity*

246

247 In age-sex adjusted models, compared with White British adults, Other White (OR=0.66 95%  
248 Confidence Interval (0.57-0.77)), Indian (0.78, (0.65-0.93)), Chinese (0.42 (0.26-0.68)),  
249 African (0.63 (0.50-0.80)) and Other adults (0.76, (0.63-0.91)) had lower odds of general  
250 multimorbidity. The odds for other ethnic groups were not statistically significant although  
251 Bangladeshi adults had higher odds (1.34, (0.98, 1.84),  $p = 0.069$ ) (Figure 1, Table S1). In  
252 fully adjusted models, the results remained significant only for Other White (0.63 (0.53-  
253 0.74)), Chinese (0.58, (0.36-0.93)) and African adults (0.54 (0.42-0.69)).

254

255 In models adjusting for single additional covariates, significant effect sizes of reduced risk  
256 were strengthened after adjusting for area deprivation, whilst adjusting for current smoking  
257 status reduced effect sizes. Bangladeshi adults had higher odds of general multimorbidity  
258 after adjusting for smoking status or BMI status, however, this association was not significant  
259 after fully adjusting for all covariates.

260

261 Among adults aged under 40, in fully adjusted models, African (0.37 (0.21-0.62)), Indian  
262 (0.37 (0.24-0.57)), Other White (0.41 (0.29-0.58)), Pakistani (0.51 (0.32-0.78)) and Other  
263 adults (0.50 (0.34-0.75)), had reduced odds of general multimorbidity compared with White  
264 British adults (Table S2). Among adults aged 40 and over in fully adjusted models (Table  
265 S3), compared with White British adults, Bangladeshi (1.27 (0.97-1.66)  $p=0.080$ ) and  
266 Pakistani adults (1.75 (1.16-2.65)) had higher odds of having general multimorbidity,  
267 whereas Other White (0.81, (0.68-0.96)), Chinese adults (0.62 (0.36-1.07,  $p=0.086$ )) and  
268 African adults had lower odds (0.63, (0.47-0.83)).

269

270 *Figure 2 Cardiovascular multimorbidity*

271

272 Figure 2 (Table S4) presents odds ratios for cardiovascular multimorbidity among adults  
273 aged 40+. In age-sex adjusted models, compared with White British adults, Pakistani (4.01  
274 (2.94-5.46)), Bangladeshi (3.73 (2.15-6.47)), Caribbean (2.93 (2.15-3.98)), Indian (2.52  
275 (1.97-3.24)), White mixed (2.23 (1.32-3.76)), Other (1.93 (1.46-2.54)), and African adults  
276 (1.86 (1.23-2.81)) had higher odds of having cardiovascular multimorbidity. In fully adjusted  
277 models, the relationship remained significant for all ethnicities. The effect sizes were  
278 attenuated for Caribbean (2.18 (1.58-2.99)), African (1.61 (1.05-2.47)), Pakistani (3.48 (2.52-  
279 4.80)), White Mixed (1.98 (1.14-3.44)), and Bangladeshi (3.67 (1.98-6.78)) adults and  
280 strengthened for Indian (3.31 (2.56-4.28)) and Other adults (2.12 (1.60-2.82)).

281

282 Broadly, introducing area-deprivation reduced effect sizes for all significant effects, whereas  
283 adjusting for smoking strengthened the effects (with the exception of White Mixed adults).  
284 Adjusting for BMI status had a differential effect, slightly attenuating effect sizes for African  
285 and Caribbean adults whilst strengthening effect sizes for Bangladeshi, Indian, Other Mixed  
286 and Pakistani adults.

287

288 *Figure 3 Multiple cardiometabolic risk biomarkers*

289

290 In sex-age adjusted models, among adults aged 16+, compared with White British adults,  
291 Indian (1.54 (1.17-2.03)) and Caribbean adults (1.46 (0.98- 2.19),  $p=0.064$ ) had greater odds  
292 of multiple risk biomarkers (Figure 3). In fully adjusted models, the results were strengthened  
293 for Indian adults (1.81 (1.36- 2.41)) and were no longer significant for Caribbean adults.

294

295 When based on a larger sample (not restricted to those with BMI measurements),  
296 statistically significant results were apparent for similar ethnic groups in the same direction  
297 (Table S5). Additionally, Indian adults had lower odds of general multimorbidity (0.78 (0.66-  
298 0.91) and Caribbean adults had increased odds of multiple risk biomarkers (1.47 (1.01-  
299 2.14)).

300

301

## 302 **Discussion**

303

304 General multimorbidity varied with age among ethnic groups, with the risk being greater  
305 among the British White population aged under 40, and greater among ethnic minorities  
306 (Pakistani and Bangladeshi) aged 40 and over. Age-related differences in patterns of  
307 multimorbidity by ethnicity, was also found in a recent study,(22). This correlates well with  
308 the increased risk of cardiovascular multimorbidity among Pakistani and Bangladeshi adults  
309 aged 40 and over; however, differences between other ethnic groups and greater risk of  
310 cardiovascular multimorbidity but not general multimorbidity suggest the general white  
311 population has higher prevalence of non-cardiovascular longstanding conditions and/or there  
312 are ethnic differences in reporting or in being diagnosed.

313

314 Chinese and Asian Indian adults were less likely to report having multimorbidity in the US,  
315 however, they were more likely to have a combination of high cholesterol and hypertension,  
316 risk factors for CVD consistent with our study,(9). Cultural barriers or differences in  
317 considering what constitutes a long-term condition could be a possible explanation for the  
318 discrepancy, which requires further investigation. In this study, among those who had  
319 cardiovascular multimorbidity, around one in four did not report having general  
320 multimorbidity, indicating a discrepancy between definitions, supporting this theory. Healthier  
321 ethnic minorities compared with the British White majority, in terms of multimorbidity, could  
322 also be due to a 'healthy migrant effect',(23). In our study, African, Chinese, Other White and  
323 Indian adults (<40 years) had a lower risk of general multimorbidity. Likewise similar groups  
324 were found to be less likely than the majority white population to report poorer self-rated

325 health in a different study using the HSE,(15), further highlighting the need to separate these  
326 distinct ethnic groups.

327

328 Despite the reduced risk of general multimorbidity for some ethnic groups, Indian and African  
329 adults and other ethnic groups (Pakistani, Bangladeshi, Caribbean and White Mixed)), were  
330 at increased risk of cardiovascular multimorbidity, consistent with a study which found the  
331 South Asian and Black populations to have the highest rates of cardiovascular multimorbidity  
332 in East London,(4). It is established that ethnic minorities have greater cardiometabolic risk  
333 factors,(24). In particular, South Asian and Black adults are more likely to have hypertension  
334 and Type 2 Diabetes,(23–25). Moreover, for the South Asian population, the risks of Type 2  
335 diabetes and dyslipidaemia are apparent at lower levels of BMI compared with the white  
336 population,(24). We too found Indian and Bangladeshi adults to be at greater risk of  
337 cardiometabolic multimorbidity despite having lower levels of obesity than the average in this  
338 study. The exact mechanisms behind the differences in risk among ethnicities are not fully  
339 understood but are likely due to a complex interplay between genetics and environmental  
340 factors,(24).

341 The association between ethnicity and multimorbidity remained after adjusting for  
342 socioeconomic factors, obesity and smoking, suggesting ethnicity to be an independent risk  
343 factor for general and cardiovascular multimorbidity. Other studies which adjust for  
344 socioeconomic factors have found the greater risk of multimorbidity for ethnic minorities  
345 remain,(6,8) or even strengthen, when based on a younger sample,(8). In our models,  
346 adjusting for area-deprivation and education tended to reduce the effect, whereas  
347 adjustment for smoking and obesity tended to strengthen the effect. In general, after full  
348 adjustment, the net effect was a slight reduction in risk, although the Indian population was  
349 an exception with a slightly stronger effect after full adjustment, suggesting that the risk for  
350 the Indian population is greater despite lower levels of smoking and obesity, and higher  
351 levels of educational attainment, which requires further investigation.

352

353 Multiple cardiometabolic risk biomarkers exceeding recommended targets, particularly  
354 among Indian and Caribbean adults, could be one explanation behind the increase in  
355 cardiovascular multimorbidity. Exceeding targets could be exacerbated by undiagnosed  
356 diseases or poorer management, such as lack of treatment or adherence to treatment.  
357 Ethnic minority groups may face barriers to treatment or health-seeking behaviours.  
358 Difficulties with healthcare access are well-recognised,(5). Discrimination, which we were  
359 unable to account for, was found to be a risk-factor for multimorbidity in the US,(28) and  
360 metabolic syndrome in the Netherlands,(29).

361

## 362 **Strengths and limitations**

363

364 Strengths of this study include the use of a nationally representative sample in England,  
365 where studies based on GP records may only capture people in contact with health  
366 services,(5) and studies using a selective sample of volunteers may generate conservative  
367 prevalence estimates of multimorbidity,(20). Furthermore, we were able to separate out  
368 distinct ethnic groups where differences were found especially in terms of general  
369 multimorbidity.

370

371 There are many limitations to this study. Even though eight years of data was pooled,  
372 sample sizes within distinct ethnic minorities were still relatively small. Consequently, except  
373 for cardiovascular multimorbidity, combinations of conditions could not be explored in detail  
374 and we were unable to stratify analyses by smaller age groups. We could not adjust for  
375 important covariates, such as foreign-born status, which could have suggested a healthy  
376 migrant effect, as the question was not asked in the survey years assessed. Furthermore,  
377 diet, physical activity, and mental health were not accounted for due to a lack of consistency  
378 of data being collected in all years. The extent to which culture, including influences on diet,  
379 affect multimorbidity risk could also not be assessed

380

381 There is no agreed definition of multimorbidity, and the conditions listed by participants did  
382 not include conditions that may be counted in the definition elsewhere, such as alcohol  
383 problems,(12) which makes comparing prevalence rates across studies challenging. Finally,  
384 our study was cross-sectional therefore we cannot determine the temporal order of events  
385 between variables such as deprivation and multimorbidity. However, we believe the use of a  
386 nationally representative sample and the ability to assess distinct ethnic groups offset this  
387 limitation, where research on ethnicity and multimorbidity is lacking.

388

## 389 **Conclusion**

390 Ethnic inequalities in multimorbidity vary between older and younger adults, distinct ethnic  
391 groups, and are independent of social–economic status, smoking and obesity. Differences in  
392 findings between general multimorbidity and cardiovascular multimorbidity suggests a  
393 possible healthy migrant effect, different susceptibility to different diseases, differential use of  
394 healthcare for diagnosis and management, or differences in interpretation of chronic  
395 conditions. Several ethnic minority groups among the South Asian and Black ethnic groups

396 are at risk of cardiovascular multimorbidity, which may be exacerbated by underdiagnosis  
397 and/or poorer management of cardiometabolic risk factors.

398

---

399 **Acknowledgements**

400 We thank NHS Digital for funding The Health Survey for England, participants, fieldwork staff  
401 and colleagues at Natcen, for collecting, processing the data and creating the dataset

402 **Contributors**

403 LNF designed and conceived the idea of the study, conducted analyses and drafted the  
404 manuscript. JM, LM, SS advised on analyses, and contributed to revisions of the manuscript  
405 and approved the final version.

406 **Role of the funding source**

407 The HSE is funded by NHS Digital. The authors are funded to produce HSE reports but this  
408 study received no specific funding. NHS Digital had no role in study design, interpretation or  
409 production of the manuscript.

410 **Competing interests**

411 The authors have no competing interests to declare.

412 **Ethical approval**

413 Ethical approval was obtained from the following Research Ethics Committees (REC): HSE  
414 2011 and 2012: Oxford A REC: 10/H0604/56; HSE 2013 and 2014: Oxford A REC:  
415 12/sc/0317; HSE 2015: West London NRES Committee: 14/LO/0862; HSE 2016:  
416 Nottingham REC: 15/EE/0299, HSE 2017: East of England Research Ethics Committee  
417 (Reference no 15/EE/0229), HSE 2018: East Midlands Nottingham 2 Research Ethics  
418 Committee (Reference no. 15/EM/0254).. Ethical approval was obtained ahead of data  
419 collection, no further ethical approval is needed for secondary analyses.

420 **Patient consent**

421 Verbal or written consent was obtained from each participant for their involvement ahead of  
422 data collection for the various stages of the HSE

423 **Data availability statement**

424 The Health Survey for England is available to UK Academic Institutions from the UK Data  
425 Archive subject to their end-user license. This study utilised a dataset used for the Health  
426 Survey for England report on Ethnicity, which the authors were funded to produce.



427 **Transparency statement**

428 The lead author affirms that this manuscript is an honest, accurate, and transparent account  
429 of the study being reported; no important aspects of the study have been omitted; and that  
430 any discrepancies from the study as planned have been explained.

431

432

433 **References**

- 434 1. Pearson-Stuttard J, Ezzati M, Gregg EW. Multimorbidity—a defining challenge for  
435 health systems. *The Lancet Public Health*. 2019 Dec 1;4(12):e599–600.
- 436 2. Jani BD, Hanlon P, Nicholl BI, McQueenie R, Gallacher KI, Lee D, et al. Relationship  
437 between multimorbidity, demographic factors and mortality: findings from the UK  
438 Biobank cohort. *BMC Medicine*. 2019 Apr 10;17(1):74.
- 439 3. McQueenie R, Foster HME, Jani BD, Katikireddi SV, Sattar N, Pell JP, et al.  
440 Multimorbidity, polypharmacy, and COVID-19 infection within the UK Biobank cohort.  
441 *PLOS ONE*. 2020 Aug 20;15(8):e0238091.
- 442 4. Mathur R, Hull SA, Badrick E, Robson J. Cardiovascular multimorbidity: the effect of  
443 ethnicity on prevalence and risk factor management. *Br J Gen Pract*. 2011  
444 May;61(586):e262-270.
- 445 5. Hayanga B, Stafford M, Bécarea L. Ethnic Inequalities in Healthcare Use and Care  
446 Quality among People with Multiple Long-Term Health Conditions Living in the United  
447 Kingdom: A Systematic Review and Narrative Synthesis. *International Journal of  
448 Environmental Research and Public Health* [Internet]. 2021;18(23). Available from:  
449 <https://www.mdpi.com/1660-4601/18/23/12599>
- 450 6. Verest WJGM, Galenkamp H, Spek B, Snijder MB, Stronks K, van Valkengoed IGM.  
451 Do ethnic inequalities in multimorbidity reflect ethnic differences in socioeconomic  
452 status? The HELIUS study. *European Journal of Public Health*. 2019 Aug 1;29(4):687–  
453 93.
- 454 7. Ashworth M, Durbaba S, Whitney D, Crompton J, Wright M, Dodhia H. Journey to  
455 multimorbidity: longitudinal analysis exploring cardiovascular risk factors and  
456 sociodemographic determinants in an urban setting. *BMJ Open*. 2019 Dec  
457 1;9(12):e031649.
- 458 8. Johnson-Lawrence V, Zajacova A, Sneed R. Education, race/ethnicity, and  
459 multimorbidity among adults aged 30-64 in the National Health Interview Survey. *SSM  
460 Popul Health*. 2017 Dec;3:366–72.
- 461 9. Zhang Y, Misra R, Sambamoorthi U. Prevalence of Multimorbidity among Asian Indian,  
462 Chinese, and Non-Hispanic White Adults in the United States. *Int J Environ Res Public  
463 Health*. 2020 May 11;17(9).

- 464 10. Gallacher KI, McQueenie R, Nicholl B, Jani BD, Lee D, Mair FS. Risk factors and  
465 mortality associated with multimorbidity in people with stroke or transient ischaemic  
466 attack: a study of 8,751 UK Biobank participants. *J Comorb*. 2018 Feb 19;8(1):1–8.
- 467 11. Ingram E, Ledden S, Beardon S, Gomes M, Hogarth S, McDonald H, et al. Household  
468 and area-level social determinants of multimorbidity: a systematic review. *J Epidemiol  
469 Community Health*. 2021 Mar 1;75(3):232.
- 470 12. Knies G, Kumari M. Multimorbidity is associated with the income, education,  
471 employment and health domains of area-level deprivation in adult residents in the UK.  
472 *Sci Rep*. 2022 May 4;12(1):7280.
- 473 13. Blümel JE, Carrillo-Larco RM, Vallejo MS, Chedraui P. Multimorbidity in a cohort of  
474 middle-aged women: Risk factors and disease clustering. *Maturitas*. 2020/05/04 ed.  
475 2020 Jul;137:45–9.
- 476 14. NHS Digital. Health Survey for England Additional Analyses, Ethnicity and Health,  
477 2011-2019 Experimental statistics [Internet]. [cited 2022 Feb 8]. Available from:  
478 [https://digital.nhs.uk/data-and-information/publications/statistical/health-survey-  
479 england-additional-analyses/ethnicity-and-health-2011-2019-experimental-statistics](https://digital.nhs.uk/data-and-information/publications/statistical/health-survey-england-additional-analyses/ethnicity-and-health-2011-2019-experimental-statistics)
- 480 15. Mindell JS, Knott CS, Ng Fat LS, Roth MA, Manor O, Soskolne V, et al. Explanatory  
481 factors for health inequalities across different ethnic and gender groups: data from a  
482 national survey in England. *J Epidemiol Community Health*. 2014 Dec 1;68(12):1133.
- 483 16. Mindell J, Biddulph JP, Hirani V, Stamatakis E, Craig R, Nunn S, et al. Cohort Profile:  
484 The Health Survey for England. *International Journal of Epidemiology*. 2012 Dec  
485 1;41(6):1585–93.
- 486 17. NatCen Social Research, UCL. Methods [Internet]. NHS Digital; 2019 Mar. (Health  
487 Survey for England 2018). Available from:  
488 <https://files.digital.nhs.uk/CA/2393EF/HSE18-Methods-rep.pdf>
- 489 18. The Emerging Risk Factors Collaboration. Association of Cardiometabolic  
490 Multimorbidity With Mortality. *JAMA*. 2015 Jul 7;314(1):52–60.
- 491 19. Whitty CJM, MacEwen C, Goddard A, Alderson D, Marshall M, Calderwood C, et al.  
492 Rising to the challenge of multimorbidity. *BMJ*. 2020 Jan 6;368:l6964.
- 493 20. Hanlon P, Jani BD, Nicholl B, Lewsey J, McAllister DA, Mair FS. Associations between  
494 multimorbidity and adverse health outcomes in UK Biobank and the SAIL Databank: A  
495 comparison of longitudinal cohort studies. *PLOS Medicine*. 2022 Mar  
496 7;19(3):e1003931.
- 497 21. StataCorp. 2021. Stata Statistical Software: Release 17. College Station, TX:  
498 StataCorp LLC.;
- 499 22. Hayanga B, Stafford M, Saunders CL, Bécares L. Ethnic inequalities in age-related  
500 patterns of multiple long-term conditions in England: analysis of primary care and  
501 nationally representative survey data. *medRxiv*. 2022 Jan 1;2022.08.05.22278462.
- 502 23. Moullan Y, Jusot F. Why is the ‘healthy immigrant effect’ different between European  
503 countries? *Eur J Public Health*. 2014 Aug;24 Suppl 1:80–6.

- 504 24. Dal Canto E, Farukh B, Faconti L. Why are there ethnic differences in cardio-metabolic  
505 risk factors and cardiovascular diseases? *JRSM Cardiovascular Disease*. 2018 Jan  
506 1;7:2048004018818923.
- 507 25. Cappuccio FP. Ethnicity and cardiovascular risk: variations in people of African  
508 ancestry and South Asian origin. *J Hum Hypertens*. 1997 Sep;11(9):571–6.
- 509 26. Pham TM, Carpenter JR, Morris TP, Sharma M, Petersen I. Ethnic Differences in the  
510 Prevalence of Type 2 Diabetes Diagnoses in the UK: Cross-Sectional Analysis of the  
511 Health Improvement Network Primary Care Database. *Clin Epidemiol*. 2019;11:1081–8.
- 512 27. Schofield P, Saka O, Ashworth M. Ethnic differences in blood pressure monitoring and  
513 control in south east London. *Br J Gen Pract*. 2011 Apr;61(585):190–6.
- 514 28. Oh H, Glass J, Narita Z, Koyanagi A, Sinha S, Jacob L. Discrimination and  
515 Multimorbidity Among Black Americans: Findings from the National Survey of American  
516 Life. *Journal of Racial and Ethnic Health Disparities*. 2021 Feb 1;8(1):210–9.
- 517 29. Ikram UZ, Snijder MB, Agyemang C, Schene AH, Peters RJG, Stronks K, et al.  
518 Perceived Ethnic Discrimination and the Metabolic Syndrome in Ethnic Minority  
519 Groups: The Healthy Life in an Urban Setting Study. *Psychosomatic Medicine*  
520 [Internet]. 2017;79(1). Available from:  
521 [https://journals.lww.com/psychosomaticmedicine/Fulltext/2017/01000/Perceived\\_Ethnic](https://journals.lww.com/psychosomaticmedicine/Fulltext/2017/01000/Perceived_Ethnic_Discrimination_and_the_Metabolic.12.aspx)  
522 [\\_Discrimination\\_and\\_the\\_Metabolic.12.aspx](https://journals.lww.com/psychosomaticmedicine/Fulltext/2017/01000/Perceived_Ethnic_Discrimination_and_the_Metabolic.12.aspx)
- 523
- 524
- 525

# Odds Ratio for General Multimorbidity

Model (ref:  
White British)

Odds  
ratio (95% CI)

## White Irish

|                    |                   |
|--------------------|-------------------|
| Age-sex only       | 1.04 (0.82, 1.31) |
| + Education        | 0.95 (0.74, 1.20) |
| + Area-deprivation | 1.01 (0.80, 1.28) |
| + Smoking          | 1.05 (0.83, 1.34) |
| + BMI              | 0.96 (0.75, 1.22) |
| Fully-adjusted     | 0.96 (0.75, 1.22) |

## Other White

|                    |                   |
|--------------------|-------------------|
| Age-sex only       | 0.66 (0.57, 0.77) |
| + Education        | 0.66 (0.57, 0.78) |
| + Area-deprivation | 0.61 (0.52, 0.72) |
| + Smoking          | 0.65 (0.56, 0.76) |
| + BMI              | 0.69 (0.59, 0.81) |
| Fully-adjusted     | 0.63 (0.53, 0.74) |

## Indian

|                    |                   |
|--------------------|-------------------|
| Age-sex only       | 0.78 (0.65, 0.93) |
| + Education        | 0.79 (0.66, 0.95) |
| + Area-deprivation | 0.72 (0.60, 0.86) |
| + Smoking          | 0.88 (0.74, 1.06) |
| + BMI              | 0.83 (0.69, 0.99) |
| Fully-adjusted     | 0.86 (0.72, 1.04) |

## Pakistani

|                    |                   |
|--------------------|-------------------|
| Age-sex only       | 1.08 (0.85, 1.36) |
| + Education        | 1.02 (0.81, 1.28) |
| + Area-deprivation | 0.84 (0.67, 1.05) |
| + Smoking          | 1.18 (0.93, 1.49) |
| + BMI              | 1.04 (0.82, 1.32) |
| Fully-adjusted     | 0.91 (0.72, 1.15) |

## Bangladeshi

|                    |                   |
|--------------------|-------------------|
| Age-sex only       | 1.34 (0.98, 1.84) |
| + Education        | 1.24 (0.90, 1.71) |
| + Area-deprivation | 1.01 (0.73, 1.40) |
| + Smoking          | 1.46 (1.06, 2.00) |
| + BMI              | 1.47 (1.06, 2.02) |
| Fully-adjusted     | 1.21 (0.87, 1.68) |

## Chinese

|                    |                   |
|--------------------|-------------------|
| Age-sex only       | 0.42 (0.26, 0.68) |
| + Education        | 0.43 (0.27, 0.70) |
| + Area-deprivation | 0.42 (0.26, 0.67) |
| + Smoking          | 0.48 (0.30, 0.77) |
| + BMI              | 0.53 (0.33, 0.85) |
| Fully-adjusted     | 0.58 (0.36, 0.93) |

## African

|                    |                   |
|--------------------|-------------------|
| Age-sex only       | 0.63 (0.50, 0.80) |
| + Education        | 0.64 (0.50, 0.81) |
| + Area-deprivation | 0.49 (0.39, 0.63) |
| + Smoking          | 0.72 (0.57, 0.91) |
| + BMI              | 0.58 (0.46, 0.73) |
| Fully-adjusted     | 0.54 (0.42, 0.69) |

## Caribbean

|                    |                   |
|--------------------|-------------------|
| Age-sex only       | 1.15 (0.93, 1.43) |
| + Education        | 1.12 (0.90, 1.39) |
| + Area-deprivation | 0.90 (0.72, 1.12) |
| + Smoking          | 1.17 (0.95, 1.46) |
| + BMI              | 1.05 (0.85, 1.30) |
| Fully-adjusted     | 0.88 (0.70, 1.10) |

## White mixed

|                    |                   |
|--------------------|-------------------|
| Age-sex only       | 1.24 (0.94, 1.63) |
| + Education        | 1.21 (0.92, 1.61) |
| + Area-deprivation | 1.10 (0.83, 1.46) |
| + Smoking          | 1.21 (0.91, 1.60) |
| + BMI              | 1.25 (0.94, 1.67) |
| Fully-adjusted     | 1.11 (0.83, 1.48) |

## Other mixed

|                    |                   |
|--------------------|-------------------|
| Age-sex only       | 0.81 (0.55, 1.19) |
| + Education        | 0.85 (0.57, 1.26) |
| + Area-deprivation | 0.75 (0.50, 1.11) |
| + Smoking          | 0.84 (0.57, 1.24) |
| + BMI              | 0.84 (0.57, 1.26) |
| Fully-adjusted     | 0.84 (0.56, 1.26) |

.25 .5 1 2 4

medRxiv preprint doi: <https://doi.org/10.1101/2022.10.03.22280637>; this version posted October 4, 2022. The copyright holder for this preprint (which was not certified by peer review) is the author/funder, who has granted medRxiv a license to display the preprint in perpetuity. It is made available under a [CC-BY-NC-ND 4.0 International license](https://creativecommons.org/licenses/by-nc-nd/4.0/).

# Odds Ratio for Cardiovascular Multimorbidity

Model (ref:  
White British)

Odds  
ratio (95% CI)

bioRxiv preprint doi: <https://doi.org/10.1101/2022.10.03.22280637>; this version posted October 4, 2022. The copyright holder for this preprint (which was not certified by peer review) is the author/funder, who has granted bioRxiv a license to display the preprint in perpetuity. It is made available under a [CC-BY-NC-ND 4.0 International license](https://creativecommons.org/licenses/by-nc-nd/4.0/).

| Model              | Odds ratio (95% CI) |
|--------------------|---------------------|
| <b>White Irish</b> |                     |
| Age-sex only       | 1.07 (0.72, 1.60)   |
| + Education        | 1.01 (0.68, 1.50)   |
| + Area-deprivation | 1.10 (0.74, 1.63)   |
| + Smoking          | 1.10 (0.74, 1.63)   |
| + BMI              | 1.15 (0.77, 1.71)   |
| Fully-adjusted     | 0.98 (0.65, 1.48)   |
| <b>Other White</b> |                     |
| Age-sex only       | 0.80 (0.57, 1.13)   |
| + Education        | 0.82 (0.58, 1.15)   |
| + Area-deprivation | 0.76 (0.54, 1.07)   |
| + Smoking          | 0.80 (0.57, 1.13)   |
| + BMI              | 0.84 (0.60, 1.19)   |
| Fully-adjusted     | 0.82 (0.58, 1.15)   |
| <b>Indian</b>      |                     |
| Age-sex only       | 2.52 (1.97, 3.24)   |
| + Education        | 2.55 (1.98, 3.28)   |
| + Area-deprivation | 2.37 (1.84, 3.04)   |
| + Smoking          | 2.84 (2.21, 3.66)   |
| + BMI              | 3.16 (2.46, 4.06)   |
| Fully-adjusted     | 3.31 (2.56, 4.28)   |
| <b>Pakistani</b>   |                     |
| Age-sex only       | 4.01 (2.94, 5.46)   |
| + Education        | 3.64 (2.65, 5.00)   |
| + Area-deprivation | 3.07 (2.24, 4.20)   |
| + Smoking          | 4.40 (3.22, 6.01)   |
| + BMI              | 4.11 (2.99, 5.65)   |
| Fully-adjusted     | 3.48 (2.52, 4.80)   |
| <b>Bangladeshi</b> |                     |
| Age-sex only       | 3.73 (2.15, 6.47)   |
| + Education        | 3.14 (1.79, 5.51)   |
| + Area-deprivation | 2.66 (1.48, 4.78)   |
| + Smoking          | 4.07 (2.33, 7.10)   |
| + BMI              | 4.92 (2.77, 8.75)   |
| Fully-adjusted     | 3.67 (1.98, 6.78)   |
| <b>Chinese</b>     |                     |
| Age-sex only       | 0.83 (0.29, 2.40)   |
| + Education        | 0.85 (0.29, 2.51)   |
| + Area-deprivation | 0.86 (0.30, 2.50)   |
| + Smoking          | 0.94 (0.32, 2.71)   |
| + BMI              | 1.48 (0.52, 4.21)   |
| Fully-adjusted     | 1.69 (0.59, 4.83)   |
| <b>African</b>     |                     |
| Age-sex only       | 1.86 (1.23, 2.81)   |
| + Education        | 1.95 (1.29, 2.96)   |
| + Area-deprivation | 1.42 (0.94, 2.16)   |
| + Smoking          | 2.08 (1.37, 3.14)   |
| + BMI              | 1.70 (1.11, 2.60)   |
| Fully-adjusted     | 1.61 (1.05, 2.47)   |
| <b>Caribbean</b>   |                     |
| Age-sex only       | 2.93 (2.15, 3.98)   |
| + Education        | 2.71 (1.97, 3.73)   |
| + Area-deprivation | 2.19 (1.59, 3.01)   |
| + Smoking          | 3.02 (2.22, 4.13)   |
| + BMI              | 2.67 (1.97, 3.62)   |
| Fully-adjusted     | 2.18 (1.58, 2.99)   |
| <b>White mixed</b> |                     |
| Age-sex only       | 2.23 (1.32, 3.76)   |
| + Education        | 2.15 (1.26, 3.66)   |
| + Area-deprivation | 1.93 (1.14, 3.27)   |
| + Smoking          | 2.22 (1.30, 3.78)   |
| + BMI              | 2.25 (1.32, 3.82)   |
| Fully-adjusted     | 1.98 (1.14, 3.44)   |
| <b>Other mixed</b> |                     |
| Age-sex only       | 0.92 (0.40, 2.12)   |
| + Education        | 1.02 (0.45, 2.33)   |
| + Area-deprivation | 0.85 (0.37, 1.95)   |
| + Smoking          | 0.94 (0.41, 2.18)   |
| + BMI              | 1.04 (0.45, 2.39)   |
| Fully-adjusted     | 1.06 (0.47, 2.39)   |

.25 .5 1 2 4 8 16

# Odds Ratio for Multiple Biological Risk Factors

Model (ref:  
White British)

Odds  
ratio (95% CI)

## White Irish

bioRxiv preprint doi: <https://doi.org/10.1101/2022.10.03.22280637>; this version posted October 4, 2022. The copyright holder for this preprint (which was not certified by peer review) is the author/funder, who has granted bioRxiv a license to display the preprint in perpetuity. It is made available under a [CC-BY-NC-ND 4.0 International license](https://creativecommons.org/licenses/by-nc-nd/4.0/).

| Model              | Odds ratio (95% CI) |
|--------------------|---------------------|
| Age-sex only       | 0.92 (0.69, 1.43)   |
| + Education        | 0.89 (0.57, 1.39)   |
| + Area-deprivation | 0.90 (0.58, 1.39)   |
| + Smoking          | 0.90 (0.57, 1.43)   |
| + BMI              | 0.90 (0.57, 1.43)   |
| Fully-adjusted     | 0.92 (0.58, 1.46)   |

## Other White

|                    |                   |
|--------------------|-------------------|
| Age-sex only       | 0.84 (0.66, 1.07) |
| + Education        | 0.88 (0.69, 1.12) |
| + Area-deprivation | 0.83 (0.66, 1.06) |
| + Smoking          | 0.84 (0.66, 1.07) |
| + BMI              | 0.92 (0.72, 1.17) |
| Fully-adjusted     | 0.95 (0.74, 1.21) |

## Indian

|                    |                   |
|--------------------|-------------------|
| Age-sex only       | 1.54 (1.17, 2.03) |
| + Education        | 1.60 (1.22, 2.11) |
| + Area-deprivation | 1.53 (1.16, 2.02) |
| + Smoking          | 1.58 (1.20, 2.09) |
| + BMI              | 1.68 (1.27, 2.24) |
| Fully-adjusted     | 1.81 (1.36, 2.41) |

## Pakistani

|                    |                   |
|--------------------|-------------------|
| Age-sex only       | 0.95 (0.61, 1.48) |
| + Education        | 0.96 (0.62, 1.50) |
| + Area-deprivation | 0.92 (0.59, 1.44) |
| + Smoking          | 0.96 (0.62, 1.50) |
| + BMI              | 0.89 (0.56, 1.40) |
| Fully-adjusted     | 0.93 (0.58, 1.47) |

## Bangladeshi

|                    |                   |
|--------------------|-------------------|
| Age-sex only       | 1.20 (0.63, 2.28) |
| + Education        | 1.19 (0.63, 2.27) |
| + Area-deprivation | 1.16 (0.61, 2.20) |
| + Smoking          | 1.21 (0.64, 2.29) |
| + BMI              | 1.36 (0.71, 2.61) |
| Fully-adjusted     | 1.42 (0.73, 2.76) |

## Chinese

|                    |                   |
|--------------------|-------------------|
| Age-sex only       | 0.77 (0.41, 1.46) |
| + Education        | 0.80 (0.42, 1.52) |
| + Area-deprivation | 0.77 (0.40, 1.46) |
| + Smoking          | 0.79 (0.42, 1.50) |
| + BMI              | 1.12 (0.59, 2.12) |
| Fully-adjusted     | 1.19 (0.63, 2.25) |

## African

|                    |                   |
|--------------------|-------------------|
| Age-sex only       | 1.15 (0.72, 1.85) |
| + Education        | 1.18 (0.73, 1.89) |
| + Area-deprivation | 1.12 (0.69, 1.80) |
| + Smoking          | 1.19 (0.74, 1.91) |
| + BMI              | 1.04 (0.64, 1.70) |
| Fully-adjusted     | 1.10 (0.67, 1.81) |

## Caribbean

|                    |                   |
|--------------------|-------------------|
| Age-sex only       | 1.46 (0.98, 2.19) |
| + Education        | 1.47 (0.98, 2.20) |
| + Area-deprivation | 1.42 (0.94, 2.13) |
| + Smoking          | 1.46 (0.97, 2.18) |
| + BMI              | 1.31 (0.87, 1.95) |
| Fully-adjusted     | 1.33 (0.89, 2.00) |

## White mixed

|                    |                   |
|--------------------|-------------------|
| Age-sex only       | 0.73 (0.41, 1.28) |
| + Education        | 0.73 (0.41, 1.30) |
| + Area-deprivation | 0.72 (0.41, 1.27) |
| + Smoking          | 0.72 (0.40, 1.27) |
| + BMI              | 0.74 (0.41, 1.31) |
| Fully-adjusted     | 0.74 (0.41, 1.32) |

## Other mixed

|                    |                   |
|--------------------|-------------------|
| Age-sex only       | 0.66 (0.32, 1.35) |
| + Education        | 0.69 (0.34, 1.42) |
| + Area-deprivation | 0.65 (0.32, 1.34) |
| + Smoking          | 0.67 (0.32, 1.37) |
| + BMI              | 0.74 (0.36, 1.53) |
| Fully-adjusted     | 0.77 (0.37, 1.58) |

.125 .25 .5 1 2 4
